# Supplementary material
Source: PubMed Central journal article supplement (PMC3180741)
Supplement: tableS4.pdf [file tableS4.pdf]

| <b>Supplemental Table 4.</b> List of oligonucleotides used in EMSA and luciferase assays. |   |            |                                                                             |                    |                  |
|-------------------------------------------------------------------------------------------|---|------------|-----------------------------------------------------------------------------|--------------------|------------------|
| <b>Gene</b>                                                                               |   |            | <b>Primer sequence</b>                                                      | <b>Application</b> | <b>Size (bp)</b> |
| <i>ADRB2</i>                                                                              | a | For<br>Rev | GATACGCTAGCATCATGCCACAGCCAATTTTGGAA<br>GATACGCTAGCGGGCATAAAGTCACTTCCATTGGG  | PCR cloning        | 416              |
|                                                                                           | b | For<br>Rev | ATCATGCCACAGCCAATTTTGGAAAACACA<br>TGTGTTTTTCCAAAATTGGCTGTGGCATGAT           | WT EMSA            |                  |
|                                                                                           | c | For<br>Rev | ATCATGCCACAGCCAAGTTTGGAAAACACA<br>TGTGTTTTTCCAAAATCTGGCTGTGGCATGAT          | SNP EMSA           |                  |
| <i>KCNA3</i>                                                                              | a | For<br>Rev | GATACGCTAGCGCAACACAGAAAGGCCAAACACCA<br>GATACGCTAGCGACAGCCGAACCCATCACAACAAA  | PCR cloning        | 316              |
|                                                                                           | b | For<br>Rev | TCTTCAAATGCCATTTTGGCATTGATTTG<br>CAAATCAATGCCAAAAATGGCATTTC AAGA            | WT EMSA            |                  |
|                                                                                           | c | For<br>Rev | TCTTCAAATGCCATTTTGGCATTGATTTG<br>CAAATCAATGTCAAAAATGGCATTTC AAGA            | SNP EMSA           |                  |
| <i>CDH3</i>                                                                               | a | For<br>Rev | GATACGCTAGCAGCTGTCACCTTCACTAGGCTTGAG<br>GATACGCTAGCAGCGCATTAAACCCGTCCTTTGTG | PCR cloning        | 217              |
|                                                                                           | b | For<br>Rev | GCATTTTAAACCTTTAGAGGAAATTCAGCT<br>AGCTGAATTTCTCTAAAGGTTTAAATGC              | WT EMSA            |                  |
|                                                                                           | c | For<br>Rev | GCATTTTAAACCTTTAGGGAAATTCAGCT<br>AGCTGAATTTCCCTAAAGGTTTAAATGC               | SNP EMSA           |                  |
| <i>RALYL</i>                                                                              | a | For<br>Rev | GATACGCTAGCGGTTTGCATTCCAATGCGTAAACAGA<br>GATACGCTAGCCCTGACATAGCCACATGCACCTT | PCR cloning        | 361              |
|                                                                                           | b | For<br>Rev | AATTGTAATCCAATTAAGGCAATAATTGTA<br>TACAATTATTGCCTTAATTGGATTACAATT            | WT EMSA            |                  |
|                                                                                           | c | For<br>Rev | AATTGTAATCCAATTAAGTCAATAATTGTA<br>TACAATTATTGACTTAATTGGATTACAATT            | SNP EMSA           |                  |
| <i>PLAGL2</i>                                                                             | a | For<br>Rev | GATACGCTAGCTAGGCTCCCTGGAGACCCAGATAA<br>GATACGCTAGCATGGAAGATGTCGAAAGCCTGGGA  | PCR cloning        | 286              |
|                                                                                           | b | For<br>Rev | CCCTGGAGACCAGATAAGGCGCTGCTGAC<br>GTCAGCAGCGCCTTATCTGGGTCTCCAGGG             | WT EMSA            |                  |
|                                                                                           | c | For<br>Rev | CCCTGGAGACCAGGTAAGGCGCTGCTGAC<br>GTCAGCAGCGCCTTACTGGGTCTCCAGGG              | SNP EMSA           |                  |
| <i>ABHD5</i>                                                                              | a | For<br>Rev | GATACGCTAGCTCTGGCAACACTATTGTGGAGGCT<br>GATACGCTAGCACCGCGCCAGCTGTATTTCTTTA   | PCR cloning        | 184              |
|                                                                                           | b | For<br>Rev | TTCTGAGTAACCCAGTTTTGGGAAGGCCT<br>AGGCCTTCCAAAACCTGGGGTFACTCAGAA             | WT EMSA            |                  |
|                                                                                           | c | For<br>Rev | TTCTGAGTAACCCAGTTTTGGGAGGCCT<br>AGGCCTCCAAAACCTGGGGTFACTCAGAA               | SNP EMSA           |                  |
| <i>GRK6</i>                                                                               | a | For<br>Rev | GATACAGATCTATGACGGACGTCTTCTTACCCAA<br>GATACAGATCTCATTGACCAATCACCGGGCAGAA    | PCR cloning        | 300              |
|                                                                                           | b | For<br>Rev | GAGGGCTCGGCCCTAATTGGCAGTTTGGTA<br>TACCAAATGCCAATTAGGGCCGAGCCCTC             | WT EMSA            |                  |
|                                                                                           | c | For<br>Rev | GAGGGCTCGGCCCTAAGTGGCAGTTTGGTA<br>TACCAAATGCCAAGTGGGCGGAGCCCTC              | SNP EMSA           |                  |
| <i>KLF6</i>                                                                               | a | For<br>Rev | GATACAGATCTTACCAGAGCCGTTTGGTGTAGAA<br>GATACAGATCTTTCACAGAATGCCGTTCCCAAGTG   | PCR cloning        | 580              |
|                                                                                           | b | For<br>Rev | TGAGCTGGGTCTTATTTGGCTGCTGATGA<br>TCATCAGCAGCAAATAAGGACCCAGCTCA              | WT EMSA            |                  |
|                                                                                           | c | For<br>Rev | TGAGCTGGGTACTTATTTGGCTGCTGATGA<br>TCATCAGCAGCAAATAAGTACCCAGCTCA             | SNP EMSA           |                  |
